# Supplementary material
Source: Research Square preprint supplement (doi:10.21203/rs.3.rs-9699215/v1)
Supplement: Supplementary file 1 [file 9560a0ede6490df9ee1a2dd6.docx]

**Supplemental Table S1** Summary of Immune-related Adverse Events

| Immune-related adverse event, n (%) | Immunochemotherapy group (n = 293) | |
| --- | --- | --- |
| Any grade | Grade 3-5 |
| Treatment-related irAE | 52（17.7） | 5（1.7） |
| Rash | 22（7.5） | 2（0.7） |
| Hypothyroidism | 12（4.1） | 1（0.3） |
| Hypopituitarism | 2（0.7） | 0（0） |
| Pneumonitis | 14（4.8） | 2（0.7） |
| Myocarditis | 2（0.7） | 0（0） |
